# Supplementary material for: Glutamine metabolism model for predicting prognosis and immune infiltration in laryngeal squamous cell carcinoma
Source: Research Square preprint supplement (doi:10.21203/rs.3.rs-5327318/v1), 2024-12-17
Supplement: Supplementary file 1 [file 539be05c5b4bfc111a385f91.docx]

Excel S1. The clinical characteristics table of 117 patients in TCGA-LSCC.


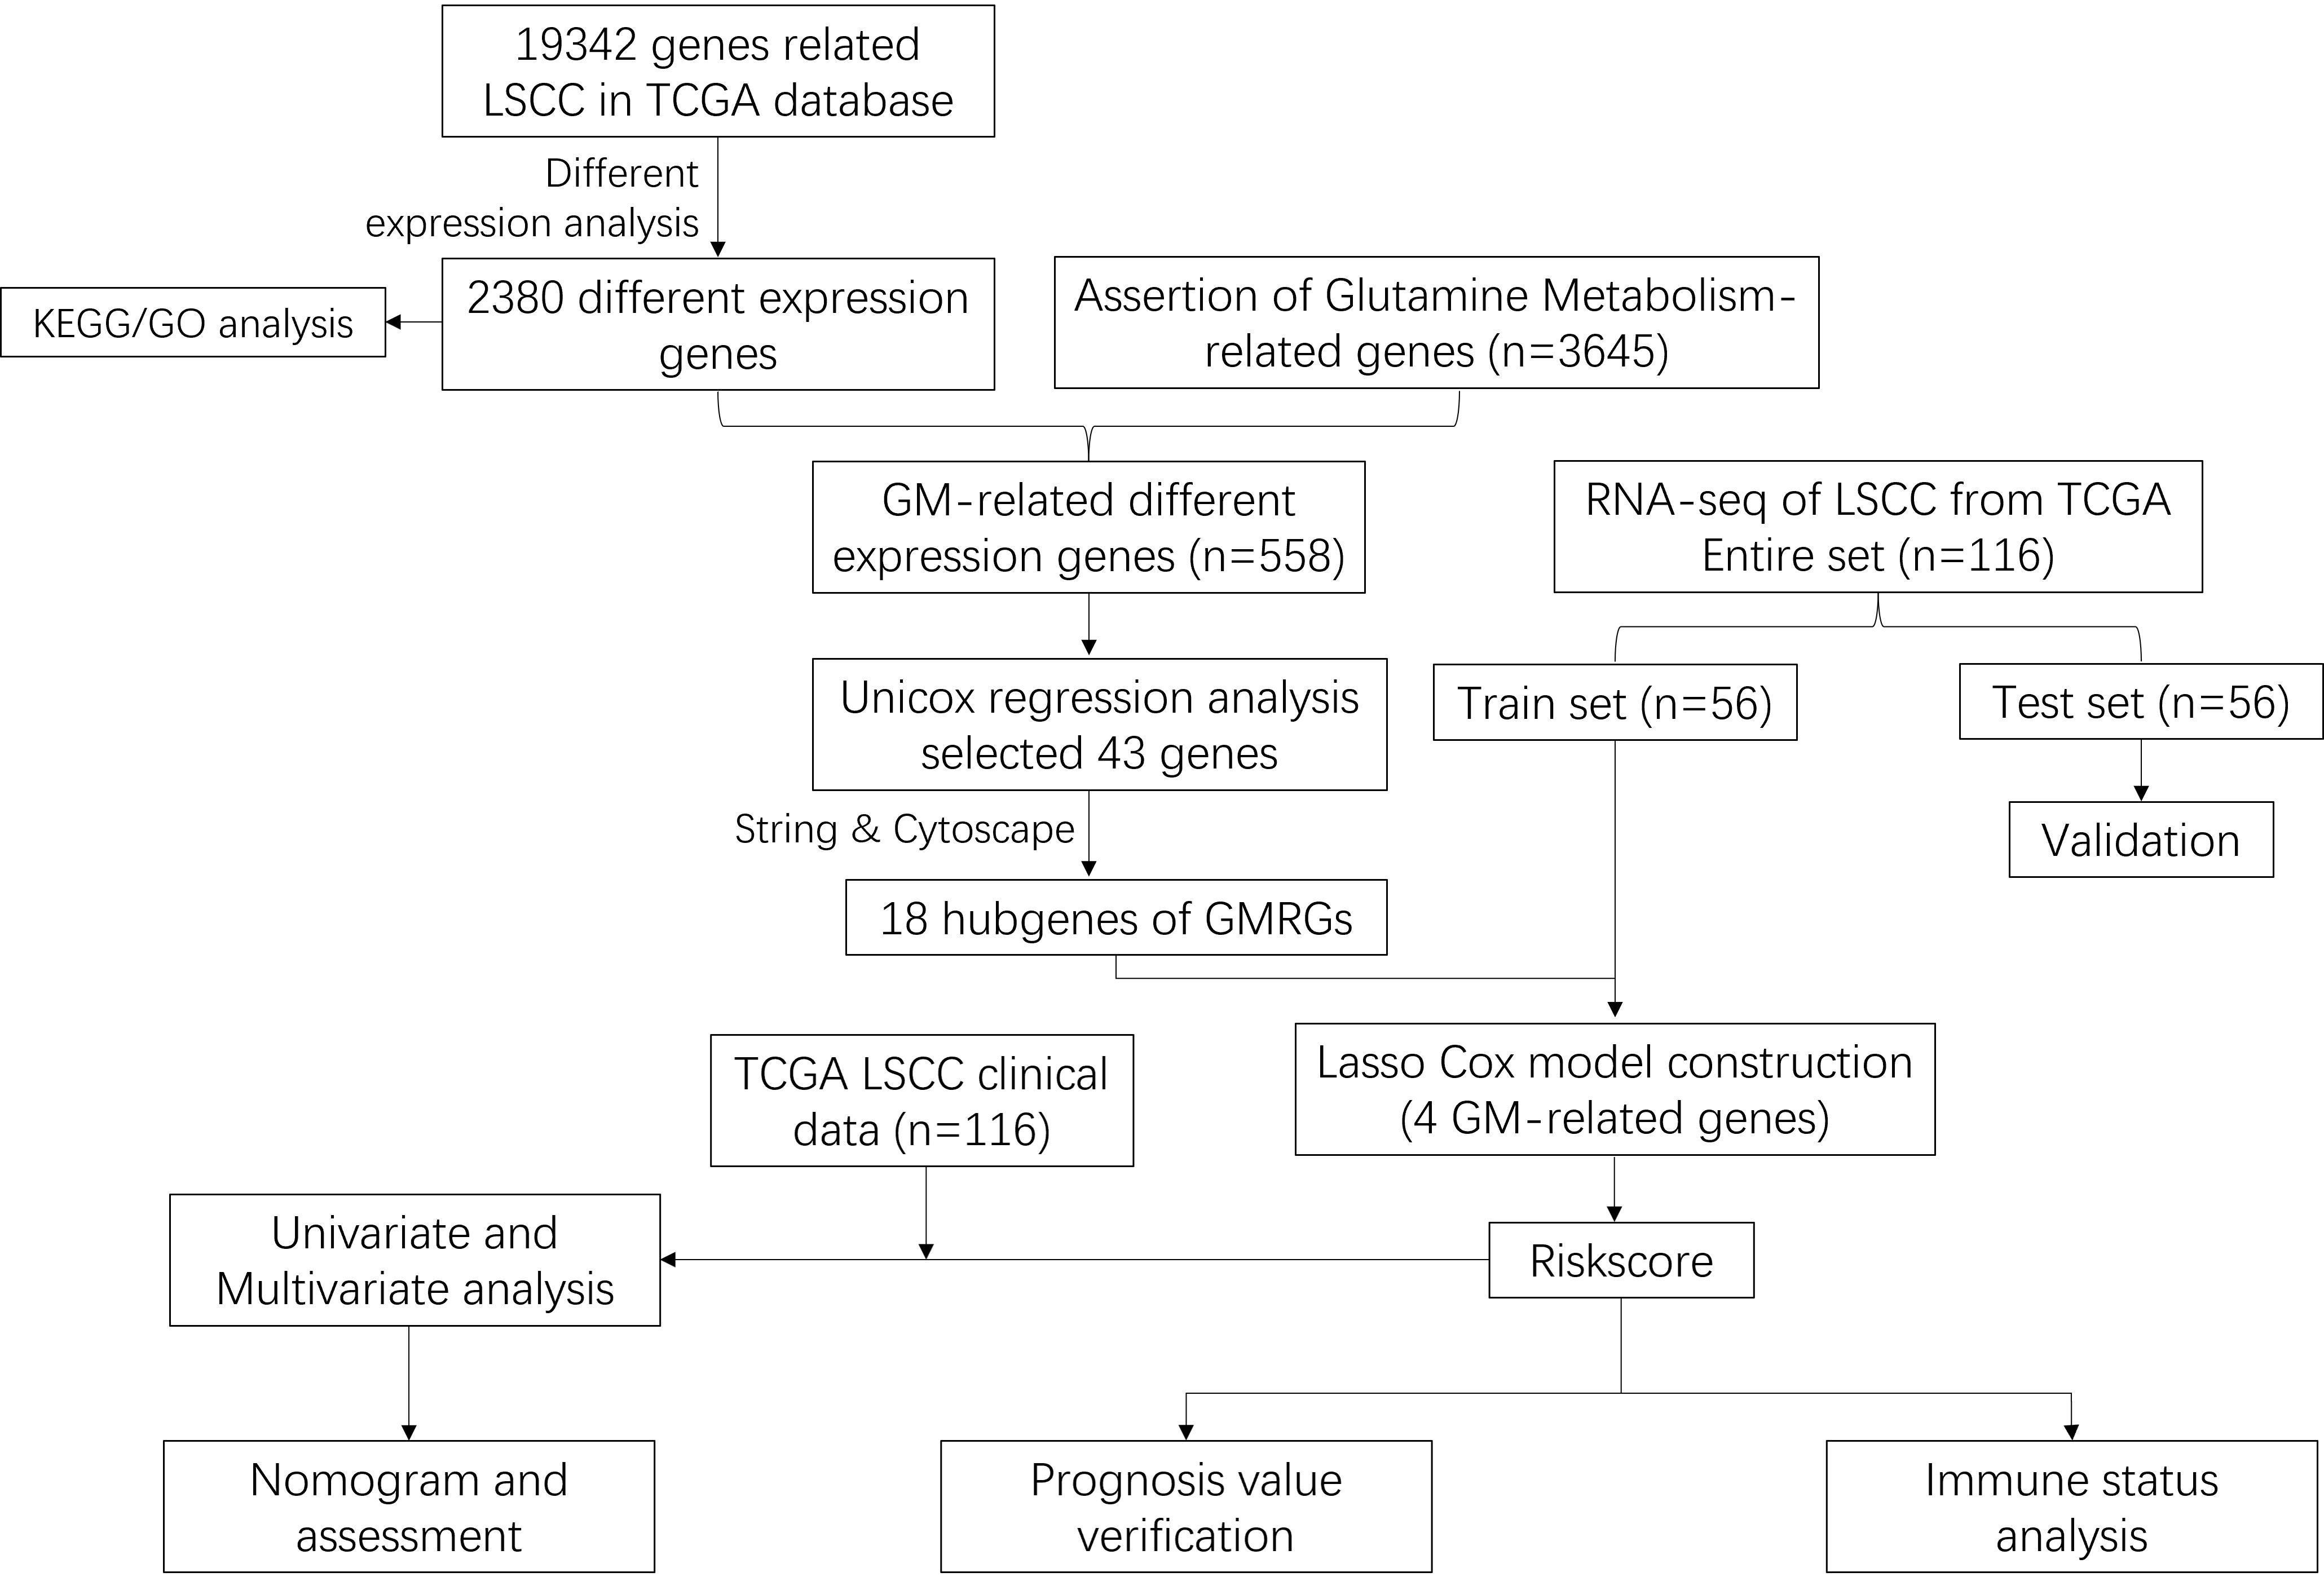


Figure S1. Analysis workflow of the study.
